# Supplementary material for: Synergic effect of two metal centers in catalytic hydrolysis of methionine-containing peptides promoted by dinuclear palladium(ii) hexaazacyclooctadecane complex
Source: Royal Society of Chemistry journal article supplement (doi:10.1039/b500210a), 2005-01-01
Supplement: b500210a-esi.pdf [file b500210a-esi.pdf]

**Supplementary material (ESI) for Dalton Transactions**  
**This journal is © The Royal Society of Chemistry 2005**

**Table S1** Variation of  $^1\text{H}$  NMR chemical shift of the  $\text{CH}_3\text{S}$  group with molar ratio of dinuclear Pd(II) complex to peptide in  $\text{D}_2\text{O}$  at  $\text{pH}^* \sim 1.0$  and room temperature

| mol ratio<br>promoter : substrate | $\delta$ ( $\text{CH}_3\text{S}$ , in ppm) |           |               |           |
|-----------------------------------|--------------------------------------------|-----------|---------------|-----------|
|                                   | AcMet-Gly                                  | AcMet-Ala | AcMet-Ala-Ser | AcMet-Pro |
| 0 : 1                             | 2.104                                      | 2.105     | 2.105         | 2.122     |
| 0.05 : 1                          | 2.115                                      | 2.113     | 2.115         | 2.131     |
| 0.1 : 1                           | 2.126                                      | 2.121     | 2.125         | 2.139     |
| 0.2 : 1                           | 2.140                                      | 2.138     | 2.147         | 2.156     |
| 0.5 : 1                           | 2.207                                      | 2.185     | 2.209         | 2.203     |
| 1 : 1                             | 2.293                                      | 2.253     | 2.302         | 2.271     |
